# Supplementary material for: Osteoarthritis Pain in Old Mice Aggravates Neuroinflammation and Frailty: The Positive Effect of Morphine Treatment
Source: MDPI journal article supplement (doi:10.3390/biomedicines10112847), 2022-11-08
Supplement: s1 [file s1]

**Table S1**

**Parameters for the frailty evaluation in mice [23, 36].**

***Integument Apparatus:***

|                       |                                                                                                                             |
|-----------------------|-----------------------------------------------------------------------------------------------------------------------------|
| Alopecia              | Age-related hair loss (thinning of the hair with hairless areas, especially at the nape of the neck).                       |
| Hairs colour loss     | Fur changing colour from black to grey or brown.                                                                            |
| Dermatitis            | Presence of skin erosions or open wounds anywhere on the body, caused by, for example, an excessive grooming or scratching. |
| Whiskers loss         | Loss of whiskers due to aging.                                                                                              |
| Fur general condition | Messy appearance of the fur, which looks tousled and no longer smooth, sleek and shiny.                                     |

***Physical/ Musculoskeletal System:***

|                        |                                                                                                                                            |
|------------------------|--------------------------------------------------------------------------------------------------------------------------------------------|
| Tumours                | Development of masses or tumours anywhere on the body.                                                                                     |
| Distended abdomen      | Enlarged abdomen. This may be due to, for example, the growth of a tumour, an organs enlargement or an intraperitoneal fluid accumulation. |
| Kyphosis               | Prominent outward curvature of the spine at the cervical/ lower thoracic level.                                                            |
| Tail stiffening        | The tail is stiff and no longer able to wrap around freely when stroked.                                                                   |
| Gait disorders         | Lack of coordination, including jumping, swinging, and gait.                                                                               |
| Tremor                 | Involuntary tremors at rest or during movement.                                                                                            |
| Forelimb grip strength | Decrease in the forelimbs grip strength.                                                                                                   |
| Body condition score   | Visual signs of muscle wasting or obesity based on the animal size.                                                                        |

***Vestibulocochlear/ Auditory Apparatus:***

|                        |                                                                                                                           |
|------------------------|---------------------------------------------------------------------------------------------------------------------------|
| Vestibular disturbance | Alterations in the ability to perceive motion and gravity, connected with balance, orientation and acceleration problems. |
| Hearing loss           | Failure to respond to a sudden sound (e.g. clicker), indicative of hearing loss or reduction.                             |

***Ocular/ Nasal Apparatus:***

|                         |                                                                                                                                                 |
|-------------------------|-------------------------------------------------------------------------------------------------------------------------------------------------|
| Cataracts               | Eye lens opacification and opaque spot in the centre of eye.                                                                                    |
| Corneal opacity         | Cloudy cornea with white spots.                                                                                                                 |
| Eye discharge/ swelling | Presence of exophthalmia, i.e. swollen and/ or bulging eyes, and may also have abnormal secretions and/ or crusting.                            |
| Microphthalmia          | Eyes small and/ or sunken, this problem may involve both or just one eye.                                                                       |
| Vision loss             | Tested by the evaluation of the animal behaviour when it is lowered by the tail and it reaches the ground.                                      |
| Menace reflex           | Evaluation of the presence or absence of a rapid blink and closure of the eyelid fissure in response to a non-tactile visual threat to the eye. |
| Nasal discharge         | Presence of abnormal discharge from the nostrils.                                                                                               |

***Digestive/ Urogenital Apparatus:***

|                 |                                                                                                                                                       |
|-----------------|-------------------------------------------------------------------------------------------------------------------------------------------------------|
| Malocclusion    | Irregular and / or too long incisors.                                                                                                                 |
| Rectal prolapse | Protrusion of the rectum from the anal orifice.                                                                                                       |
| Penile prolapse | Impossibility of the penis to re-enter its sheath, indicating the presence of a prolapse.                                                             |
| Diarrhoea       | Presence of abnormally shaped feces with litter adhering to it, or feces on the walls of the house cage, or feces, blood or litter around the rectum. |

**Respiratory System:**

|                       |                                                                                                                                             |
|-----------------------|---------------------------------------------------------------------------------------------------------------------------------------------|
| Breathing rate /depth | Development of breath problems such as dyspnoea (difficulty breathing), rales (pulmonary congestion), and/ or tachypnoea (rapid breathing). |
|-----------------------|---------------------------------------------------------------------------------------------------------------------------------------------|

**Discomfort:**

|                     |                                                                                                                                                                                                                  |
|---------------------|------------------------------------------------------------------------------------------------------------------------------------------------------------------------------------------------------------------|
| Mouse Grimace Scale | Measurement of pain / discomfort based on facial expression, assessed through five items: orbital tightening, nose swelling, cheeks swelling, ear position (backward) or moustache change (backward or forward). |
| Piloerection        | Stable condition of involuntary hair erection.                                                                                                                                                                   |

**Body temperature:** Body temperature changes relative to an adult reference group.

**Body weight:** Body weight changes relative to an adult reference group.

**for each item, rating: 0 = absent; 0.5 = mild; 1 = severe.**
